# Supplementary material for: Screening and Identification of Lujo Virus Inhibitors Using a Recombinant Reporter Virus Platform
Source: MDPI journal article supplement (doi:10.3390/v13071255), 2021-06-28
Supplement: s1 [file s1]

**Supplementary Table 1. Screening a panel of selected compounds for inhibition of LUJV/ZsG fluorescence** Compounds were screening for activity in Huh7 cells infected with LUJV/ZsG at MOI 0.1 one hour after treatment at concentrations of 5000, 500, and 50 nM. Cell viability was determined concurrently by assessing ATP content.

| Compound Name              | Relative ZsG (%) |    |        |    |       |    | Cell Viability (%) |    |        |    |       |    |
|----------------------------|------------------|----|--------|----|-------|----|--------------------|----|--------|----|-------|----|
|                            | 5000 nM          |    | 500 nM |    | 50 nM |    | 5000 nM            |    | 500 nM |    | 50 nM |    |
|                            | Mean             | SD | Mean   | SD | Mean  | SD | Mean               | SD | Mean   | SD | Mean  | SD |
| 2-chloroadenosine          | 99               | 24 | 133    | 4  | 124   | 15 | 103                | 2  | 105    | 5  | 98    | 3  |
| 2'-deoxy-2'-fluorocytidine | 2                | 0  | 27     | 5  | 90    | 2  | 105                | 0  | 98     | 13 | 117   | 6  |
| 2'-C-methylcytidine        | 103              | 29 | 144    | 29 | 124   | 29 | 99                 | 2  | 104    | 3  | 102   | 2  |
| 2'-C-methyluridine         | 126              | 3  | 142    | 24 | 132   | 13 | 97                 | 6  | 100    | 5  | 102   | 4  |
| 2'-O-methylcytidine        | 114              | 28 | 127    | 27 | 118   | 6  | 100                | 6  | 103    | 1  | 98    | 7  |
| 2'-O-methyluridine         | 110              | 54 | 130    | 29 | 122   | 18 | 96                 | 7  | 100    | 5  | 97    | 2  |
| 3-deazauridine             | 111              | 21 | 105    | 12 | 108   | 35 | 99                 | 1  | 96     | 1  | 103   | 6  |
| 5-azacytidine              | 104              | 14 | 112    | 7  | 90    | 12 | 102                | 6  | 102    | 1  | 96    | 3  |
| 5-azidouridine             | 113              | 18 | 119    | 13 | 121   | 18 | 104                | 3  | 100    | 1  | 104   | 5  |
| 5-bromouridine             | 106              | 4  | 131    | 4  | 134   | 7  | 100                | 3  | 102    | 6  | 97    | 4  |
| 5-chlorouridine            | 103              | 17 | 142    | 6  | 122   | 11 | 99                 | 2  | 103    | 3  | 100   | 3  |
| 5-fluorouridine            | 19               | 4  | 51     | 4  | 94    | 5  | 103                | 7  | 100    | 6  | 97    | 7  |
| 5-methylcytidine           | 108              | 3  | 129    | 11 | 122   | 27 | 98                 | 7  | 97     | 3  | 96    | 5  |
| 6-aza-2-thiouridine        | 112              | 25 | 139    | 4  | 134   | 18 | 103                | 3  | 96     | 5  | 104   | 5  |
| 6-azauridine               | 78               | 8  | 87     | 27 | 95    | 7  | 97                 | 7  | 103    | 5  | 98    | 5  |
| 7-DMA                      | 92               | 5  | 95     | 26 | 96    | 4  | 113                | 7  | 103    | 2  | 98    | 1  |
| 8-azaadenosine             | 6                | 0  | 121    | 17 | 118   | 11 | 47                 | 6  | 103    | 3  | 98    | 2  |
| 8-azidoadenosine           | 6                | 0  | 72     | 10 | 90    | 7  | 32                 | 3  | 87     | 4  | 104   | 3  |
| ABT-333                    | 129              | 7  | 111    | 8  | 131   | 7  | 104                | 3  | 96     | 7  | 99    | 7  |
| Adefovir dipivoxil         | 24               | 3  | 38     | 4  | 70    | 4  | 54                 | 0  | 94     | 11 | 123   | 5  |
| Afatinib                   | 2                | 0  | 74     | 14 | 76    | 8  | 60                 | 11 | 136    | 17 | 126   | 4  |
| Amiodarone                 | 3                | 1  | 60     | 9  | 80    | 8  | 86                 | 13 | 145    | 3  | 132   | 1  |
| Apatinib                   | 47               | 7  | 67     | 15 | 91    | 40 | 95                 | 10 | 119    | 11 | 113   | 4  |
| Apilimod                   | 24               | 4  | 45     | 4  | 91    | 10 | 80                 | 6  | 115    | 5  | 130   | 3  |
| AR-12 (OSU-03012)          | 2                | 0  | 54     | 7  | 74    | 21 | 1                  | 0  | 115    | 4  | 129   | 4  |
| Arbidol                    | 40               | 9  | 65     | 21 | 77    | 9  | 109                | 7  | 139    | 11 | 135   | 7  |
| Aripiprazole               | 16               | 6  | 81     | 5  | 71    | 12 | 59                 | 7  | 126    | 2  | 124   | 7  |
| Atovaquone                 | 74               | 12 | 90     | 8  | 108   | 25 | 115                | 9  | 134    | 12 | 129   | 3  |
| AVN-944                    | 1                | 0  | 4      | 1  | 43    | 8  | 64                 | 12 | 97     | 7  | 103   | 12 |
| AZD8055                    | 3                | 0  | 7      | 1  | 48    | 2  | 45                 | 1  | 52     | 2  | 86    | 8  |
| Balapiravir (R1626)        | 122              | 31 | 81     | 35 | 139   | 5  | 99                 | 7  | 104    | 4  | 104   | 6  |
| Bazedoxifene HCl           | 2                | 0  | 103    | 11 | 110   | 10 | 84                 | 6  | 147    | 8  | 141   | 1  |
| BCX-4430                   | 99               | 7  | 132    | 17 | 103   | 14 | 101                | 5  | 97     | 7  | 99    | 5  |
| Benidipine                 | 61               | 0  | 81     | 14 | 90    | 9  | 107                | 10 | 129    | 11 | 126   | 2  |
| Benztropine mesylate       | 36               | 3  | 90     | 5  | 110   | 23 | 108                | 15 | 130    | 5  | 126   | 3  |
| Brequinar                  | 2                | 0  | 2      | 0  | 27    | 14 | 67                 | 5  | 85     | 7  | 113   | 4  |
| BX-795                     | 9                | 2  | 41     | 4  | 80    | 3  | 60                 | 8  | 105    | 9  | 128   | 4  |
| Clemastine fumarate        | 6                | 3  | 81     | 7  | 95    | 8  | 107                | 2  | 116    | 6  | 115   | 1  |
| Clofazimine                | 52               | 3  | 75     | 16 | 88    | 3  | 102                | 10 | 125    | 14 | 120   | 6  |
| Clomipramine HCL           | 12               | 8  | 103    | 9  | 129   | 19 | 98                 | 6  | 97     | 7  | 97    | 2  |
| Dabrafenib                 | 22               | 2  | 79     | 17 | 87    | 28 | 68                 | 9  | 117    | 12 | 119   | 4  |
| Duloxetine HCL             | 4                | 2  | 74     | 13 | 103   | 12 | 76                 | 12 | 109    | 14 | 104   | 15 |

|                     |     |    |     |    |     |    |     |    |     |    |     |   |
|---------------------|-----|----|-----|----|-----|----|-----|----|-----|----|-----|---|
| Erlotinib           | 65  | 1  | 66  | 6  | 82  | 13 | 110 | 4  | 126 | 7  | 127 | 2 |
| Evista (raloxifene) | 3   | 1  | 89  | 20 | 87  | 8  | 86  | 5  | 136 | 11 | 139 | 2 |
| Gefitinib           | 48  | 8  | 71  | 2  | 77  | 21 | 101 | 4  | 121 | 1  | 128 | 4 |
| Genistein           | 92  | 10 | 68  | 4  | 83  | 13 | 106 | 0  | 111 | 13 | 123 | 8 |
| Gleevec             | 56  | 18 | 113 | 11 | 95  | 4  | 96  | 4  | 96  | 5  | 101 | 4 |
| Isavuconazole       | 34  | 8  | 75  | 10 | 73  | 9  | 75  | 5  | 121 | 3  | 114 | 4 |
| Lacidipine          | 47  | 10 | 90  | 7  | 90  | 20 | 98  | 12 | 129 | 15 | 138 | 3 |
| Gefitinib           | 48  | 8  | 71  | 2  | 77  | 21 | 101 | 4  | 121 | 1  | 128 | 4 |
| Lamuvudine          | 102 | 16 | 117 | 15 | 77  | 11 | 104 | 6  | 97  | 7  | 95  | 5 |
| Loperamide HCL      | 1   | 0  | 81  | 9  | 104 | 8  | 85  | 9  | 104 | 9  | 99  | 7 |
| Losmapimod          | 63  | 5  | 70  | 2  | 60  | 6  | 114 | 6  | 115 | 3  | 113 | 3 |
| Miconazole nitrate  | 47  | 1  | 78  | 5  | 65  | 16 | 67  | 2  | 120 | 4  | 119 | 7 |
| Mycophenolic acid   | 2   | 0  | 7   | 1  | 72  | 5  | 48  | 4  | 100 | 7  | 132 | 2 |
| Nebivolol           | 18  | 5  | 58  | 18 | 76  | 16 | 76  | 5  | 108 | 7  | 110 | 3 |
| NH125               | 2   | 0  | 28  | 9  | 60  | 12 | 1   | 0  | 63  | 10 | 104 | 7 |
| Niclosamide         | 2   | 0  | 2   | 0  | 30  | 6  | 1   | 0  | 2   | 0  | 77  | 4 |
| NITD008             | 136 | 7  | 110 | 3  | 122 | 14 | 97  | 4  | 96  | 5  | 99  | 7 |
| Obatoclax           | 10  | 1  | 4   | 0  | 36  | 7  | 2   | 1  | 25  | 4  | 130 | 1 |
| Paroxetine HCl      | 48  | 4  | 83  | 6  | 93  | 12 | 110 | 1  | 145 | 6  | 138 | 0 |
| Pazopanib HCl       | 24  | 5  | 59  | 4  | 77  | 17 | 54  | 3  | 116 | 4  | 134 | 1 |
| PRT062607 HCl       | 8   | 6  | 70  | 15 | 89  | 34 | 79  | 8  | 114 | 5  | 113 | 3 |
| PSI-6130            | 114 | 42 | 90  | 20 | 149 | 3  | 99  | 5  | 96  | 2  | 100 | 5 |
| PSI-6206            | 128 | 36 | 87  | 12 | 141 | 17 | 104 | 1  | 96  | 5  | 103 | 5 |
| PSI-7976            | 124 | 39 | 80  | 11 | 96  | 9  | 107 | 1  | 99  | 3  | 94  | 2 |
| PSI-7977            | 118 | 16 | 95  | 7  | 119 | 12 | 104 | 6  | 97  | 5  | 101 | 3 |
| R-1479              | 103 | 32 | 100 | 31 | 118 | 6  | 96  | 3  | 101 | 5  | 104 | 7 |
| R-7128              | 126 | 28 | 80  | 20 | 133 | 23 | 103 | 2  | 98  | 2  | 100 | 7 |
| R09187              | 88  | 12 | 122 | 16 | 116 | 6  | 102 | 4  | 98  | 4  | 99  | 6 |
| Ribavirin           | 63  | 11 | 73  | 6  | 94  | 21 | 133 | 6  | 122 | 11 | 124 | 3 |
| Sertraline          | 35  | 5  | 69  | 7  | 80  | 1  | 107 | 8  | 128 | 11 | 122 | 6 |
| Stavudine           | 96  | 21 | 104 | 19 | 125 | 30 | 103 | 6  | 98  | 7  | 101 | 6 |
| ST-193              | 91  | 12 | 102 | 5  | 107 | 11 | 101 | 7  | 98  | 6  | 105 | 8 |
| Sulconazole nitrate | 42  | 5  | 66  | 12 | 86  | 11 | 52  | 12 | 131 | 7  | 132 | 0 |
| T-705               | 22  | 8  | 95  | 11 | 94  | 14 | 96  | 7  | 104 | 3  | 101 | 1 |
| Tamoxifen citrate   | 2   | 0  | 78  | 20 | 84  | 4  | 85  | 5  | 123 | 8  | 123 | 3 |
| Tenofivir           | 96  | 28 | 138 | 27 | 114 | 5  | 100 | 4  | 100 | 3  | 101 | 6 |
| Tetrandrine         | 2   | 0  | 75  | 0  | 95  | 6  | 1   | 0  | 95  | 4  | 115 | 6 |
| Toremifene citrate  | 9   | 2  | 88  | 7  | 86  | 26 | 93  | 7  | 128 | 12 | 122 | 0 |
| Toyocamycin         | 7   | 0  | 12  | 1  | 69  | 5  | 23  | 4  | 64  | 9  | 97  | 2 |
| TWS119              | 13  | 3  | 74  | 18 | 74  | 17 | 36  | 2  | 124 | 36 | 135 | 4 |
| Tyrphostin AG1478   | 87  | 7  | 73  | 0  | 80  | 4  | 111 | 3  | 101 | 16 | 120 | 2 |
| Zidovudine          | 92  | 9  | 88  | 10 | 99  | 10 | 93  | 9  | 105 | 2  | 97  | 4 |
